# Supplementary material for: Structural insights into human EMC and its interaction with VDAC
Source: publisher site journal article supplement (doi:10.18632/aging.205660), 2024-03-15
Supplement: Supplementary file [file aging-v16i6-205660-supplementary-material-SD2.pdf]

## SUPPLEMENTARY TABLE

Supplementary Table 1. Cryo-EM data collection and refinement statistics.

|                                           | <b>Apo-EMC</b><br><b>EMD-35906</b><br><b>PDB 8J0N</b> | <b>EMC-VDAC1</b><br><b>EMD-35907</b><br><b>PDB 8J0O</b> |
|-------------------------------------------|-------------------------------------------------------|---------------------------------------------------------|
| <b>Data collection and processing</b>     |                                                       |                                                         |
| EM equipment                              | FEI Titan Krios                                       | FEI Titan Krios                                         |
| Magnification                             | 81,000                                                | 81,000                                                  |
| Voltage (kV)                              | 300                                                   | 300                                                     |
| Detector                                  | Gatan K3                                              | Gatan K3                                                |
| Pixel size (Å)                            | 1.09                                                  | 1.09                                                    |
| Electron dose (e-/Å <sup>2</sup> )        | 50                                                    | 50                                                      |
| Defocus range (µm)                        | -1.2 to -2.5                                          | -1.2 to -2.5                                            |
| <b>Reconstruction</b>                     |                                                       |                                                         |
| Software                                  | Relion 3.0, cryoSPARC                                 | Relion 3.0, cryoSPARC                                   |
| Number of used particles                  | 693,381                                               | 455,504                                                 |
| Final resolution (Å)                      | 3.47                                                  | 3.32                                                    |
| FSC threshold                             | 0.143                                                 | 0.143                                                   |
| Map sharpening B-factor (Å <sup>2</sup> ) | -120.0                                                | -122.9                                                  |
| <b>Model building</b>                     |                                                       |                                                         |
| Software                                  | Coot 0.89                                             | Coot 0.89                                               |
| <b>Refinement</b>                         |                                                       |                                                         |
| Software                                  | Phenix 1.20.1                                         | Phenix 1.20.1                                           |
| Map CC                                    | 0.70                                                  | 0.72                                                    |
| <b>Model composition</b>                  |                                                       |                                                         |
| Protein residues                          | 2,301                                                 | 2,627                                                   |
| Protein atoms                             | 18,475                                                | 20,986                                                  |
| <b>Validation</b>                         |                                                       |                                                         |
| R.M.S deviations                          |                                                       |                                                         |
| Bond lengths (Å)                          | 0.010                                                 | 0.014                                                   |
| Bond angles (°)                           | 0.948                                                 | 1.083                                                   |
| Ramachandran plot (%)                     |                                                       |                                                         |
| Preferred region                          | 91.50                                                 | 91.37                                                   |
| Allowed region                            | 8.23                                                  | 8.36                                                    |
| Outlier region                            | 0.26                                                  | 0.27                                                    |
| MolProbity score                          | 2.01                                                  | 2.13                                                    |
| Clashscore (all-atom)                     | 9.72                                                  | 12.97                                                   |
| Poor rotamers (%)                         | 0.75                                                  | 0.40                                                    |
